# Supplementary material
Source: publisher figshare collection journal article supplement (https://acs.figshare.com/ndownloader/files/7032839)
Supplement: Supplementary file 1 [file 7032839]

Compound	smiles	FLIPR alpha7 EC50, nM ± SEM (n)	5-HT3A (IC50, nM ± SEM (n)	FLIPR Selectivity Ratio vs 5-HT3A
25	[N@]1(CC2)CC[C@@H]2C3(CN=C(NC4=CC=CC=C4)O3)C1	5400 ± 1700 (3)	230 ± 4 (3)	0.04
26	[N@]1(CC2)CC[C@@H]2C3(CN=C(NC4=NC=CS4)O3)C1	200 ± 60 (6)	25 ± 6 (6)	0.1
27	[N@]1(CC2)CC[C@@H]2C3(CN=C(NC4=NC=C(C5=CC=CC=C5)S4)O3)C1	400 ± 420 (6)	20000 ± 4900 (6)	51
28	[N@]1(CC2)CC[C@@H]2C3(CN=C(NC4=NC(C5=CC=CC=C5)=CS4)O3)C1	450 ± 100 (4)	11 ± 3 (4)	0.02
29	[N@]1(CC2)CC[C@@H]2C3(CN=C(NC4=NC(C=CC=C5)=C5S4)O3)C1	20 ± 12 (7)	36 ± 12 (7)	1.8
30	[N@]1(CC2)CC[C@@H]2C3(CN=C(NC4=CC=C(SC=N5)C5=C4)O3)C1	3100 ± 1400 (2)	41000 ± 32000 (2)	13
31	[N@]1(CC2)CC[C@@H]2C3(CN=C(NC4=NC=CC=C4)O3)C1	180 ± 50 (7)	16 ± 3 (7)	0.1
32	[N@]1(CC2)CC[C@@H]2C3(CN=C(NC4=CN=CC=C4)O3)C1	21000 ± 13000 (7)	2300 ± 1000 (7)	0.1
33	[N@]1(CC2)CC[C@@H]2C3(CN=C(NC4=CC=NC=C4)O3)C1	11000 ± 6000 (4)	58000 ± 10000 (4)	5
34	COC1=CC=CC(S2)=C1N=C2NC(O3)=NCC43C[N@@]5CC[C@H]4CC5	830 ± 330 (4)	13 ± 3 (4)	0.02
35	COC(C=C1)=CC2=C1SC(NC(O3)=NCC43C[N@@]5CC[C@H]4CC5)=N2	1100 ± 800 (4)	19 ± 4 (4)	0.02
36	COC1=CC(S2)=C(C=C1)N=C2NC(O3)=NCC43C[N@@]5CC[C@H]4CC5	120 ± 90 (6)	19000 ± 4000 (6)	153
37	COC1=CC(S2)=C(C=C1OC)N=C2NC(O3)=NCC43C[N@@]5CC[C@H]4CC5	11000 ± 2900 (4)	27000 ± 11000 (4)	3
38	CCOC1=CC(S2)=C(C=C1)N=C2NC(O3)=NCC43C[N@@]5CC[C@H]4CC5	320 ± 390, (9)	14000 ± 6900 (9)	42
39	ClC1=CC(S2)=C(C=C1)N=C2NC(O3)=NCC43C[N@@]5CC[C@H]4CC5	150 ± 90 (4)	8100 ± 3900 (4)	53
40	CC1=CC(S2)=C(C=C1)N=C2NC(O3)=NCC43C[N@@]5CC[C@H]4CC5	120 ± 30 (6)	3800 ± 140 (6)	32
41	OC1=CC(S2)=C(C=C1)N=C2NC(O3)=NCC43C[N@@]5CC[C@H]4CC5	980 ± 530 (4)	11000 ± 400 (4)	11
42	COC1=CC(S2)=C(C=C1)N=C2NC3=NC4(CO3)C[N@@]5CC[C@H]4CC5	7800 ± 3900 (5)	47000 ± 18000 (5)	6
43	CN(/C(O1)=N\C2=NC(C=CC(OC)=C3)=C3S2)CC41C[N@@]5CC[C@H]4CC5	>100000	>100000	N/A
44	COC1=CC(S2)=C(C=C1)N=C2NC(O3)=NCCC43C[N@@]5CC[C@H]4CC5	3700 ± 3300 (7)	64000 ± 29000 (7)	17
45	[H][C@]12CC[N@@](C2)C[C@@]13CN=C(NC4=NC5=C(C=CC=C5)S4)O3	22 ± 26 (4)	480 ± 280 (4)	22
46	[N@]12CC[C@@H](C2)C3(CN=C(NC4=NC5=C(C=CC=C5)S4)O3)C1	260 ± 180 (4)	35 ± 5 (4)	0.06
47	[H][C@]12CCC[N@@](C2)CC13CN=C(NC4=NC5=C(C=CC=C5)S4)O3	290 ± 110 (4)	950 ± 290 (4)	3
48	[C@H]1(C2)C3(CN=C(NC4=NC5=C(C=CC=C5)S4)O3)C[N@@]2CCC1	700 ± 360 (5)	7 ± 0 (5)	<0.01
49	[N@]1(CC2)CC[C@@H]2[C@]3(COC(NC4=NC(C=CC=C5)=C5S4)=N3)C1	21 ± 22 (7)	21 ± 5 (7)	1
50	[N@]1(CC2)CC[C@@H]2[C@@]3(COC(NC4=NC(C=CC=C5)=C5S4)=N3)C1	1300 ± 400 (9)	7300 ± 1500 (9)	6
51	COC1=CC(S2)=C(C=C1)N=C2NC3=N[C@@]4(CO3)C[N@@]5CC[C@H]4CC5	140 ± 70 (8)	9100 ± 1800 (8)	66
52	COC1=CC(S2)=C(C=C1)N=C2NC3=N[C@]4(CO3)C[N@@]5CC[C@H]4CC5	1900 ± 200 (5)	>9700 (5)	85
53	[N@]1(CC2)CC[C@@H]2[C@]3(CN=C(NC4=NC=CC=C4)O3)C1	110 ± 40 (4)	15 ± 2 (4)	0.1
54	[N@]1(CC2)CC[C@@H]2[C@]3(CN=C(NC4=NC=CC(C5=CC=CC=C5)=C4)O3)C1	8.9 ± 6.7 (4)	85 ± 26 (4)	9.6
55	[N@]1(CC2)CC[C@@H]2[C@]3(CN=C(NC4=NC=C(C5=CC=CC=C5)C=C4)O3)C1	750 ± 350 (4)	2200 ± 4000 (4)	30
56	[N@]1(CC2)CC[C@@H]2[C@]3(CN=C(NC4=NC(C=CC=C5)=C5C=C4)O3)C1	26 ± 15 (10)	8 ± 4 (11)	0.3
57	[N@]1(CC2)CC[C@@H]2[C@]3(CN=C(NC4=NC=C(C=CC=C5)C5=C4)O3)C1	9.3 ± 5.3 (29)	480 ± 160 (29)	52
58	[N@]1(CC2)CC[C@@H]2[C@]3(CN=C(NC4=NC=CC5=C4C=CC=C5)O3)C1	210 ± 150 (4)	1600 ± 700 (4)	7.5
